# Supplementary material for: Development and External Validation of an Interpretable Machine-Learning Model for HFpEF Comorbidity Risk in COPD Patients
Source: Research Square preprint supplement (doi:10.21203/rs.3.rs-7911218/v1), 2025-11-10
Supplement: Supplementary file 1 [file a064f62a7c69231ebee56efa.docx]

Table 1 Abbreviations and definitions for all variables.

| **Variable** | **Variable Comments** |
| --- | --- |
| Sex | Gender |
| ALCHO | Alcohol Use History |
| Smoking status | Tobacco Use History |
| Diabetes | History of Diabetes Mellitus |
| Hypertension | History of Hypertension |
| CVD | History of Coronary Artery Disease |
| OSA | History of Obstructive Sleep Apnea |
| MMRC | Modified British Medical Research Council Questionnaire |
| HAPPEN | Number of Exacerbations in the past year |
| HOSPITAL | Number of Hospitalizations for COPD Exacerbations in the past year |
| TEAM | Gold Group |
| ACUTE | Acute Exacerbation |
| NONSMOKE | Smoking Cessation Duration |
| CAT | COPD Assessment Test |
| BMI | Body Mass Index |
| Age | Age |
| LOS | Length of Stay |
| THC | Total Hospitalization Cost |
| SMOKEN | Pack-Year History |
| TIME | Duration of Illness |
| RBC | Red Blood Cell |
| HEM | Hemoglobin |
| WBC | White Blood Cell |
| NEU | Neutrophil |
| LYM | Lymphocyte |
| NLR | Neutrophil/ Lymphocyte |
| EOS | Eosinophil |
| BAS | Basophil |
| PLA | Platelet |
| TP | Total Protein |
| ALB | Albumin |
| GLO | Globulin |
| TRI | Triglycerides |
| CHO | Cholesterol |
| LDL | Low-Density Lipoprotein |
| LDH | Lactate Dehydrogenase |
| BUN | Blood Urea Nitrogen |
| CRE | Creatinine |
| UA | Uric Acid |
| PT | Prothrombin Time |
| PROA | Prothrombin Activity |
| INR | International Normalized Ratio |
| APTT | Activated Partial Thromboplastin Time |
| TT | Thrombin Time |
| FIB | Fibrinogen |
| D-dimer | D-dimer |
| NT-proBNP | N-terminal pro-B-type natriuretic peptide |
| CRP | C-Reactive Protein |
| FVC | Forced Vital Capacity |
| FEV1 | Forced Expiratory Volume in 1 second |
| IC | Inspiratory capacity |
| MVV | Maximum Voluntary Ventilation |
| DLCo | Diffusing Capacity for Carbon Monoxide |
| TLC | Total Lung Capacity |
| RV1 | Residual Volume |
| FENO | Fractional Exhaled Nitric Oxide |
| IVS | Interventricular Septum Thickness |
| LA | Left Atrial Dimension |
| RA | Right Atrial Dimension |
| RV2 | Right Ventricular Dimension |
| LV | Left Ventricular Dimension |
| EF | Ejection Fraction |
| FS | Fractional Shortening |
| A wave | Late Diastolic Mitral Inflow Velocity |
| a | Atrial Contraction Velocity |
| PH | Potential of Hydrogen |
| PO2 | Arterial Partial Pressure of Oxygen |
| PCO2 | Partial Pressure of Carbon Dioxide |
| HCO3- | Bicarbonate Ion |
| SO2 | Oxygen Saturation |
| LAC | Lactic Acid |

Table 2 Univariate and Multivariate Logistic Regression on the Entire Dataset

| **Variable** | **N** | COPD without HFpEF N = 803 | COPD with HFpEF N = 747 | **p-value** | **q-value**1 |
| --- | --- | --- | --- | --- | --- |
| **Sex, n (%)** | 1,550 |  |  | 0.0632 | 0.083 |
| 1 |  | 645 (80) | 571 (76) |  |  |
| 2 |  | 158 (20) | 176 (24) |  |  |
| **ALCHO, n (%)** | 1,550 |  |  | <0.0012 | <0.001 |
| 0 |  | 754 (94) | 659 (88) |  |  |
| 1 |  | 49 (6.1) | 88 (12) |  |  |
| **Smoking status, n (%)** | 1,550 |  |  | 0.0112 | 0.017 |
| 0 |  | 329 (41) | 259 (35) |  |  |
| 1 |  | 474 (59) | 488 (65) |  |  |
| **Diabetes, n (%)** | 1,550 |  |  | <0.0012 | <0.001 |
| 0 |  | 706 (88) | 522 (70) |  |  |
| 1 |  | 97 (12) | 225 (30) |  |  |
| **Hypertension, n (%)** | 1,550 |  |  | 0.0022 | 0.003 |
| 0 |  | 469 (58) | 377 (50) |  |  |
| 1 |  | 334 (42) | 370 (50) |  |  |
| **CVD, n (%)** | 1,550 |  |  | <0.0012 | <0.001 |
| 0 |  | 561 (70) | 395 (53) |  |  |
| 1 |  | 242 (30) | 352 (47) |  |  |
| **OSA, n (%)** | 1,550 |  |  | 0.0052 | 0.009 |
| 0 |  | 795 (99) | 725 (97) |  |  |
| 1 |  | 8 (1.0) | 22 (2.9) |  |  |
| **MMRC, n (%)** | 1,550 |  |  | <0.0012 | <0.001 |
| 1 |  | 123 (15) | 61 (8.2) |  |  |
| 2 |  | 336 (42) | 272 (36) |  |  |
| 3 |  | 290 (36) | 333 (45) |  |  |
| 4 |  | 54 (6.7) | 81 (11) |  |  |
| **HAPPEN, n (%)** | 1,550 |  |  | 0.902 | 0.93 |
| 0 |  | 423 (53) | 396 (53) |  |  |
| 1 |  | 174 (22) | 173 (23) |  |  |
| 2 |  | 158 (20) | 139 (19) |  |  |
| 3 |  | 30 (3.7) | 25 (3.3) |  |  |
| 4 |  | 18 (2.2) | 14 (1.9) |  |  |
| **HOSPITAL, n (%)** | 1,550 |  |  | 0.922 | 0.93 |
| 0 |  | 421 (52) | 404 (54) |  |  |
| 1 |  | 300 (37) | 267 (36) |  |  |
| 2 |  | 69 (8.6) | 64 (8.6) |  |  |
| 3 |  | 13 (1.6) | 12 (1.6) |  |  |
| **TEAM, n (%)** | 1,550 |  |  | 0.0402 | 0.056 |
| 1 |  | 67 (8.3) | 49 (6.6) |  |  |
| 2 |  | 357 (44) | 299 (40) |  |  |
| 3 |  | 379 (47) | 399 (53) |  |  |
| **ACUTE, n (%)** | 1,550 |  |  | 0.0312 | 0.044 |
| 0 |  | 183 (23) | 137 (18) |  |  |
| 1 |  | 620 (77) | 610 (82) |  |  |
| **NONSMOKE, Median (IQR)** | 1,550 | 0.000 (0.000 – 0.000) | 0.000 (0.000 – 1.000) | <0.0013 | <0.001 |
| **CAT, Median (IQR)** | 1,550 | 20.000 (15.000 – 24.000) | 26.000 (20.000 – 28.000) | <0.0013 | <0.001 |
| **AGE, Median (IQR)** | 1,550 | 72.000 (67.000 – 78.000) | 73.000 (67.000 – 79.000) | 0.823 | 0.88 |
| **LOS, Median (IQR)** | 1,550 | 8.000 (7.000 – 10.000) | 8.000 (7.000 – 10.000) | 0.0193 | 0.028 |
| **THC, Median (IQR)** | 1,550 | 6,364.000 (5,058.000 – 7,744.000) | 6,718.000 (5,240.000 – 8,681.000) | <0.0013 | <0.001 |
| **BMI, Median (IQR)** | 1,550 | 22.100 (20.313 – 23.875) | 21.926 (20.109 – 23.875) | 0.203 | 0.25 |
| **SMOKEN, Median (IQR)** | 1,550 | 500.000 (0.000 – 1,000.000) | 400.000 (0.000 – 1,000.000) | 0.923 | 0.93 |
| **TIME, Median (IQR)** | 1,550 | 6.000 (4.000 – 10.000) | 10.000 (5.000 – 11.000) | <0.0013 | <0.001 |
| **RBC, Median (IQR)** | 1,550 | 4.310 (4.060 – 4.570) | 4.210 (3.840 – 4.640) | 0.0043 | 0.006 |
| **HEM, Median (IQR)** | 1,550 | 132.000 (126.000 – 140.000) | 132.000 (117.000 – 142.000) | 0.0043 | 0.007 |
| **WBC, Median (IQR)** | 1,550 | 6.210 (5.200 – 7.650) | 5.900 (4.700 – 8.000) | 0.0673 | 0.086 |
| **NEU, Median (IQR)** | 1,550 | 3.940 (2.990 – 5.000) | 3.790 (2.740 – 6.150) | 0.643 | 0.71 |
| **LYM, Median (IQR)** | 1,550 | 1.420 (1.030 – 1.900) | 1.130 (0.820 – 1.620) | <0.0013 | <0.001 |
| **NLR, Median (IQR)** | 1,550 | 2.542 (2.066 – 4.430) | 3.227 (2.033 – 6.125) | <0.0013 | <0.001 |
| **EOS, Median (IQR)** | 1,550 | 0.150 (0.090 – 0.380) | 0.110 (0.030 – 0.240) | <0.0013 | <0.001 |
| **BAS, Median (IQR)** | 1,550 | 0.030 (0.020 – 0.040) | 0.030 (0.020 – 0.060) | 0.243 | 0.30 |
| **PLA, Median (IQR)** | 1,550 | 187.000 (154.000 – 221.000) | 172.000 (151.000 – 205.000) | <0.0013 | <0.001 |
| **TP, Median (IQR)** | 1,550 | 60.300 (55.900 – 64.200) | 59.500 (56.000 – 63.200) | 0.0783 | 0.10 |
| **ALB, Median (IQR)** | 1,550 | 37.600 (35.500 – 39.800) | 37.400 (34.500 – 39.100) | <0.0013 | <0.001 |
| **GLO, Median (IQR)** | 1,550 | 22.100 (19.100 – 25.200) | 22.700 (19.300 – 25.400) | 0.523 | 0.60 |
| **TRI, Median (IQR)** | 1,550 | 0.860 (0.660 – 1.180) | 0.880 (0.680 – 1.330) | <0.0013 | <0.001 |
| **CHO, Median (IQR)** | 1,550 | 3.800 (3.300 – 4.390) | 3.700 (3.130 – 3.920) | 0.0023 | 0.003 |
| **LDL, Median (IQR)** | 1,550 | 2.160 (1.560 – 2.600) | 2.070 (1.750 – 2.620) | 0.493 | 0.58 |
| **LDH, Median (IQR)** | 1,550 | 165.000 (152.000 – 186.000) | 167.000 (141.000 – 195.000) | 0.803 | 0.86 |
| **BUN, Median (IQR)** | 1,550 | 5.500 (4.300 – 6.600) | 5.200 (4.100 – 6.400) | 0.0133 | 0.020 |
| **CRE, Median (IQR)** | 1,550 | 70.000 (58.900 – 82.000) | 67.000 (58.800 – 78.000) | 0.0033 | 0.005 |
| **UA, Median (IQR)** | 1,550 | 288.000 (227.000 – 378.000) | 310.000 (264.000 – 366.000) | <0.0013 | <0.001 |
| **PT, Median (IQR)** | 1,550 | 11.700 (11.300 – 12.400) | 11.900 (11.100 – 12.800) | 0.523 | 0.60 |
| **PROA, Median (IQR)** | 1,550 | 87.500 (79.100 – 94.000) | 87.400 (77.300 – 94.100) | 0.613 | 0.67 |
| **INR, Median (IQR)** | 1,550 | 1.000 (0.960 – 1.050) | 1.000 (0.950 – 1.080) | 0.563 | 0.63 |
| **APTT, Median (IQR)** | 1,550 | 27.900 (26.000 – 29.200) | 28.400 (26.600 – 30.500) | 0.0513 | 0.070 |
| **TT, Median (IQR)** | 1,550 | 16.300 (15.400 – 17.300) | 16.000 (15.100 – 16.700) | <0.0013 | <0.001 |
| **FIB, Median (IQR)** | 1,550 | 3.100 (2.580 – 3.870) | 3.600 (2.820 – 4.720) | <0.0013 | <0.001 |
| **D-dimer, Median (IQR)** | 1,550 | 0.400 (0.240 – 0.690) | 0.530 (0.310 – 0.800) | <0.0013 | <0.001 |
| **NT-proBNP, Median (IQR)** | 1,550 | 123.000 (96.000 – 293.000) | 625.000 (290.000 – 1,200.000) | <0.0013 | <0.001 |
| **CRP, Median (IQR)** | 1,550 | 12.000 (4.070 – 35.000) | 27.000 (7.640 – 52.470) | <0.0013 | <0.001 |
| **FVC, Median (IQR)** | 1,550 | 66.000 (53.000 – 79.000) | 56.000 (46.000 – 72.000) | <0.0013 | <0.001 |
| **FEV1, Median (IQR)** | 1,550 | 53.000 (35.000 – 67.000) | 45.000 (34.000 – 61.000) | <0.0013 | <0.001 |
| **FEV1/FVC, Median (IQR)** | 1,550 | 61.000 (54.000 – 65.000) | 59.000 (50.000 – 65.000) | 0.0043 | 0.007 |
| **IC, Median (IQR)** | 1,550 | 2.100 (1.510 – 2.890) | 1.510 (1.120 – 2.130) | <0.0013 | <0.001 |
| **IC% pred, Median (IQR)** | 1,550 | 64.000 (48.000 – 76.000) | 57.000 (41.000 – 67.000) | <0.0013 | <0.001 |
| **MVV, Median (IQR)** | 1,550 | 35.000 (26.000 – 47.000) | 33.000 (25.000 – 49.000) | 0.0093 | 0.014 |
| **DLCo, Median (IQR)** | 1,550 | 62.000 (45.000 – 83.000) | 52.000 (35.000 – 71.000) | <0.0013 | <0.001 |
| **TLC, Median (IQR)** | 1,550 | 4.450 (3.260 – 5.470) | 4.320 (3.450 – 5.430) | 0.873 | 0.92 |
| **TLC%, Median (IQR)** | 1,550 | 70.000 (55.000 – 85.000) | 65.000 (57.000 – 78.000) | <0.0013 | 0.001 |
| **RV1, Median (IQR)** | 1,550 | 1.940 (1.440 – 2.480) | 1.960 (1.580 – 2.270) | 0.543 | 0.62 |
| **RV%, Median (IQR)** | 1,550 | 79.000 (59.000 – 100.000) | 75.000 (64.000 – 90.000) | 0.0643 | 0.083 |
| **RV/TLC, Median (IQR)** | 1,550 | 55.000 (45.000 – 89.000) | 47.000 (41.000 – 69.000) | <0.0013 | <0.001 |
| **FENO, Median (IQR)** | 1,550 | 25.000 (16.000 – 38.000) | 24.000 (16.000 – 35.000) | 0.0323 | 0.046 |
| **IC/TLC, Median (IQR)** | 1,550 | 0.507 (0.376 – 0.658) | 0.410 (0.291 – 0.511) | <0.0013 | <0.001 |
| **IVS, n (%)** | 1,550 |  |  | <0.0012 | <0.001 |
| 7 |  | 24 (3.0) | 31 (4.1) |  |  |
| 8 |  | 89 (11) | 71 (9.5) |  |  |
| 9 |  | 217 (27) | 118 (16) |  |  |
| 10 |  | 292 (36) | 237 (32) |  |  |
| 11 |  | 81 (10) | 101 (14) |  |  |
| 12 |  | 88 (11) | 108 (14) |  |  |
| 13 |  | 10 (1.2) | 55 (7.4) |  |  |
| 14 |  | 2 (0.2) | 26 (3.5) |  |  |
| **LA, Median (IQR)** | 1,550 | 32.000 (30.000 – 35.000) | 34.000 (32.000 – 37.000) | <0.0013 | <0.001 |
| **RA, Median (IQR)** | 1,550 | 30.000 (27.000 – 32.000) | 31.000 (29.000 – 35.000) | <0.0013 | <0.001 |
| **RV2, Median (IQR)** | 1,550 | 22.000 (20.000 – 24.000) | 23.000 (21.000 – 25.000) | <0.0013 | <0.001 |
| **LV, Median (IQR)** | 1,550 | 40.000 (38.000 – 43.000) | 40.000 (38.000 – 45.000) | 0.253 | 0.30 |
| **EF, Median (IQR)** | 1,550 | 61.000 (59.000 – 64.990) | 61.000 (59.000 – 64.000) | 0.0523 | 0.070 |
| **FS, Median (IQR)** | 1,550 | 33.000 (31.000 – 35.790) | 32.930 (30.290 – 35.000) | <0.0013 | <0.001 |
| **A wave, Median (IQR)** | 1,550 | 80.000 (71.000 – 90.000) | 90.000 (79.000 – 102.000) | <0.0013 | <0.001 |
| **a, Median (IQR)** | 1,550 | 9.200 (8.000 – 10.400) | 9.000 (8.000 – 10.000) | <0.0013 | <0.001 |
| **PH, Median (IQR)** | 1,550 | 7.410 (7.390 – 7.436) | 7.400 (7.380 – 7.430) | <0.0013 | <0.001 |
| **PO2, Median (IQR)** | 1,550 | 72.000 (65.900 – 79.600) | 64.800 (58.000 – 72.700) | <0.0013 | <0.001 |
| **PCO2, Median (IQR)** | 1,550 | 41.600 (38.600 – 44.000) | 40.900 (37.200 – 45.600) | 0.933 | 0.93 |
| **HCO3-, Median (IQR)** | 1,550 | 26.200 (24.800 – 28.000) | 26.500 (24.700 – 28.900) | 0.0183 | 0.027 |
| **SO2, Median (IQR)** | 1,550 | 94.500 (92.700 – 96.000) | 92.200 (90.000 – 94.900) | <0.0013 | <0.001 |
| **LAC, Median (IQR)** | 1,550 | 1.000 (0.800 – 1.100) | 1.000 (0.800 – 1.400) | <0.0013 | <0.001 |
| 1False discovery rate correction for multiple testing | | | | | |
| 2Pearson's Chi-squared test | | | | | |
| 3Wilcoxon rank sum test | | | | | |

Table3 Comparison of 10 Machine Learning Models on Internal Validation Data

| Model | AUC | Accuracy | Sensitivity | Specificity | PPV | NPV | Precision | F1 |
| --- | --- | --- | --- | --- | --- | --- | --- | --- |
| Logistic | 0.827, 95%CI:0.789−0.866 | 0.793 | 0.819 | 0.773 | 0.739 | 0.844 | 0.739 | 0.777 |
| SVM | 0.885, 95%CI:0.851−0.918 | 0.875 | 0.951 | 0.815 | 0.802 | 0.954 | 0.802 | 0.870 |
| GBM | 0.899, 95%CI:0.868−0.930 | 0.888 | 0.946 | 0.842 | 0.825 | 0.951 | 0.825 | 0.881 |
| NeuralNetwork | 0.860, 95%CI:0.826−0.895 | 0.812 | 0.789 | 0.831 | 0.785 | 0.833 | 0.785 | 0.787 |
| RandomForest | 0.892, 95%CI:0.861−0.924 | 0.894 | 0.961 | 0.842 | 0.827 | 0.965 | 0.827 | 0.889 |
| Xgboost | 0.898, 95%CI:0.867−0.929 | 0.886 | 0.961 | 0.827 | 0.896 | 0.755 | 0.813 | 0.881 |
| KNN | 0.896, 95%CI:0.865−0.926 | 0.886 | 0.946 | 0.838 | 0.821 | 0.951 | 0.821 | 0.879 |
| Adaboost | 0.890, 95%CI:0.861−0.919 | 0.845 | 0.956 | 0.758 | 0.755 | 0.957 | 0.756 | 0.844 |
| LightGBM | 0.881, 95%CI:0.847−0.915 | 0.873 | 0.917 | 0.838 | 0.815 | 0.927 | 0.817 | 0.864 |
| CatBoost | 0.897, 95%CI:0.866−0.928 | 0.879 | 0.951 | 0.823 | 0.808 | 0.954 | 0.808 | 0.874 |


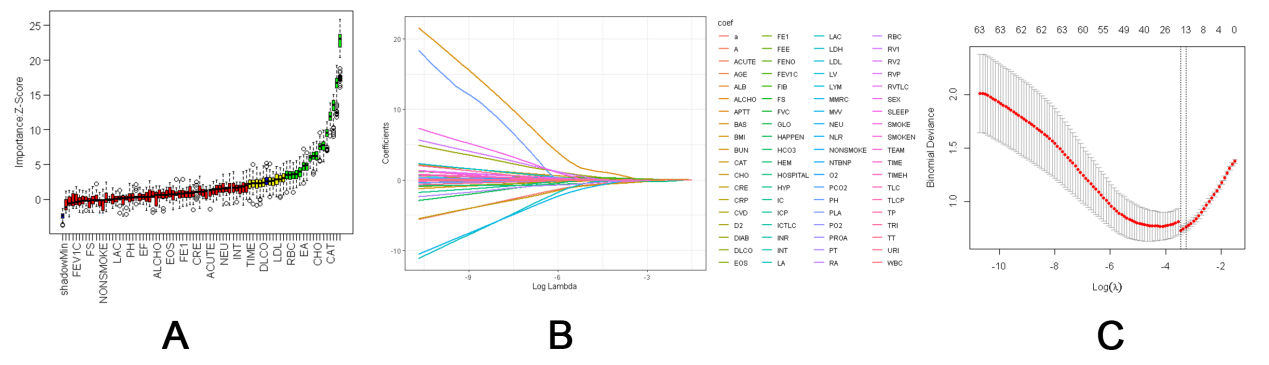


Figure 1 Important variable selection. (A) Boruta regression is used to screen important variables. (B) Lasso regression screening important variables. (C) 10-fold cross-validation to optimize the Lasso regression penalty parameter (λ).


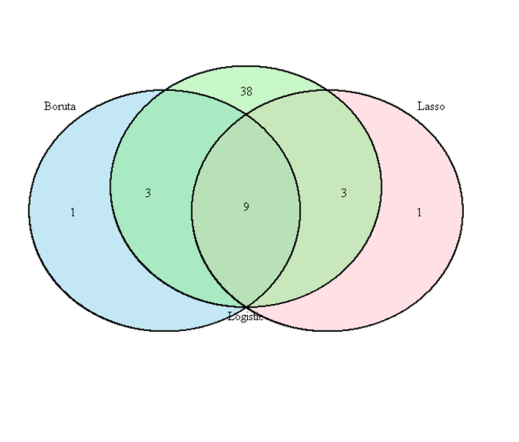


Figure 2 Venn diagram of variable selection by the Lasso regression, Logistic regression, and Boruta algorithms.

In terms of variable selection, variables that are significant in at least two variable selection methods are included in the model construction.

Variables selected by Lasso regression are: *"ALCHO, CAT, RBC, NLR, TP, CHO, FIB, NT-proBNP, IC, IC%, A, a, PO2"*

Variables selected by Logistic regression are: *"ALCHO, Smoking status, Diabetes, Hypertension, CVD, OSA, MMRC, CAT, THC, TIME, LYM, NLR, EOS, PLA, TRI, CHO, BUN, CRE, URI, TT, FIB, D-dimer, NT-proBNP, CRP, FVC, FEV1, IC, IC%, DLCO, TLC%, RV/TLC, IC/TLC, INT, LA, RA, RV2, FS, A, a, PH, PO2, SO2, LAC"*

Variables selected by Boruta random forest are: *"SO2, PO2, RV2, RA, INT, IC/TLC, TLC%, FVC, CRP, NT-proBNP, D-dimer, WBC, HEM, RBC, TIME, CAT, MMRC, OSA, CVD, Hypertension, Diabetes, Smoking status, ALCHO, SEX"*

The final variables included are: *“NT-proBNP, RBC,FIB, CHO, PaO₂, IC, IC% pred, A wave, CAT”*


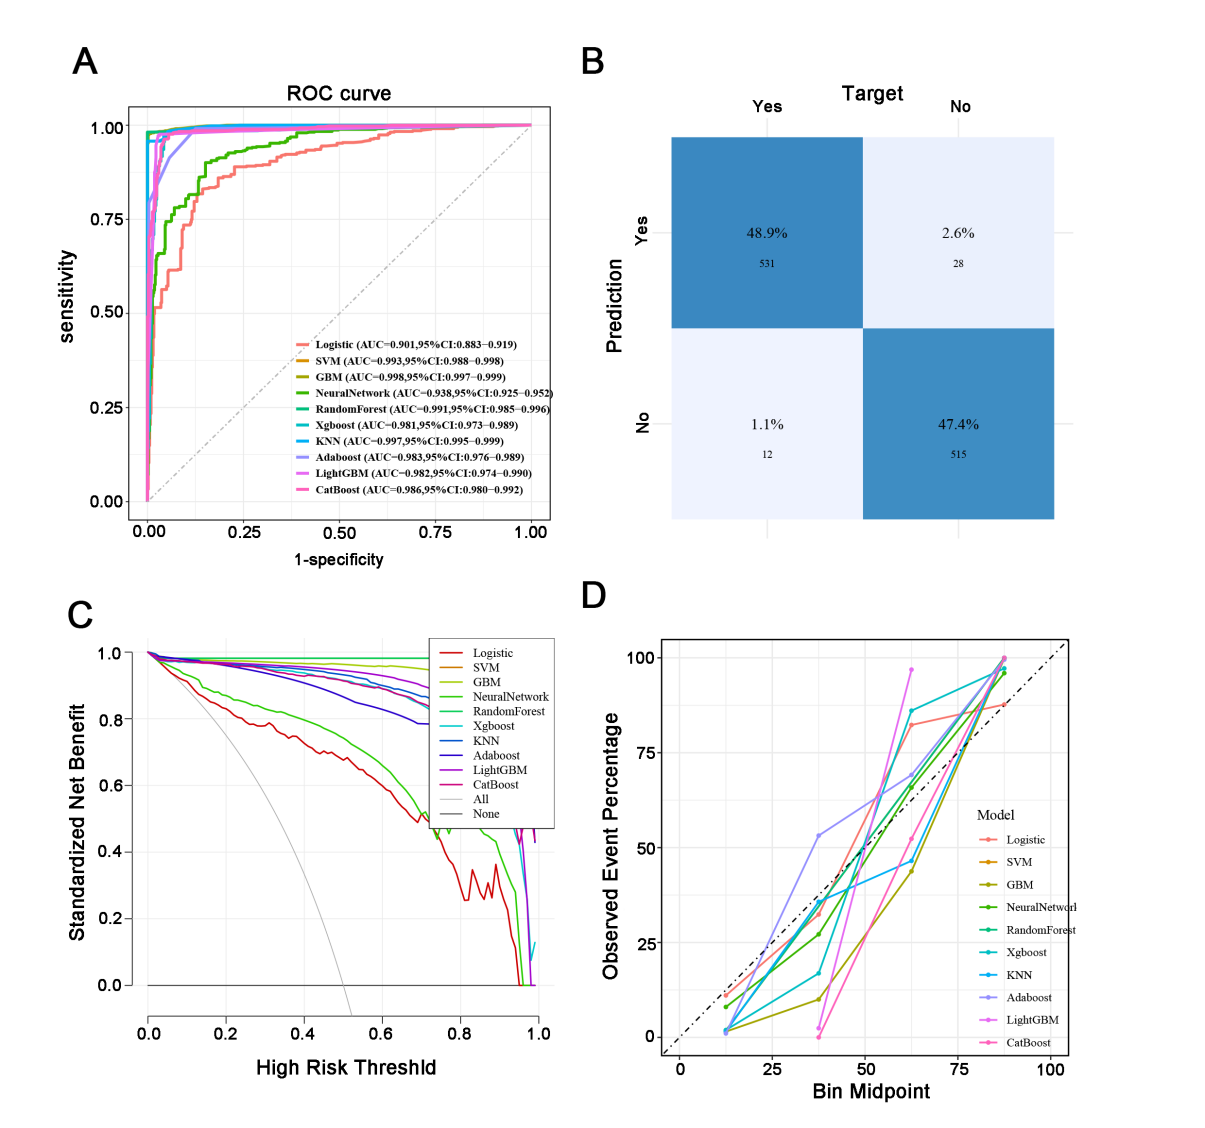


Figure 3 **Testing and evaluation of eXtreme Gradient Boosting model based on training validation data.**

A: Area under the receiver operating characteristic curve comparison between models;

B: The confusion matrix of eXtreme Gradient Boosting model;

C: Comparison of decision curve analysis curves between models;

D: Comparison of calibration curves between models.

AUC: Area under the receiver operating characteristic curve; ROC: Receiver operating characteristic; SVM: Support vector machine; GBM: Gradient boosting machines; KNN: K-nearest neighbors; LightGBM: Light gradient boosting machine.
